# Supplementary material
Source: Springer Nature journal article supplement (https://www.springermedizin.de/resource/supplementary/13058_2013_3419_MOESM10_ESM.pdf/9704106)

Progeny of ALDEFLUOR positive cells in vivo

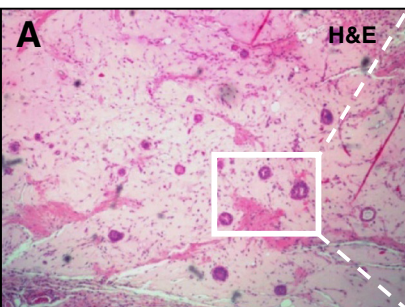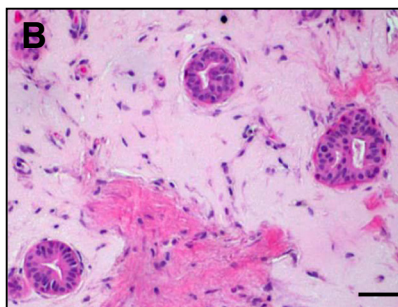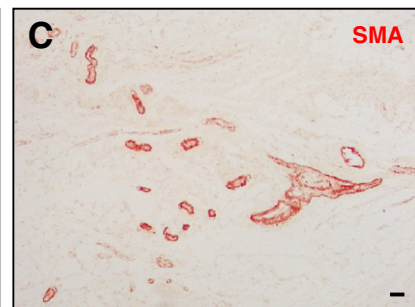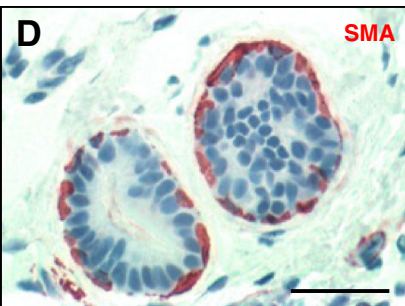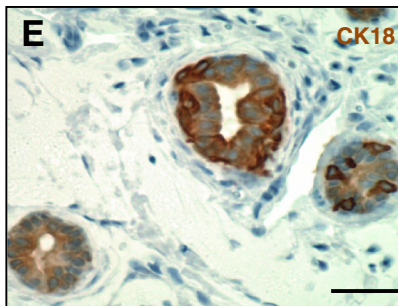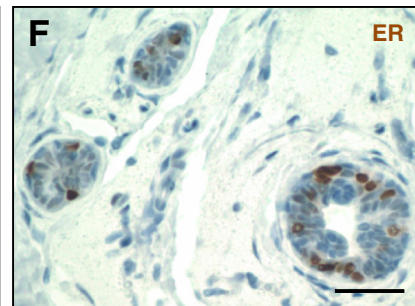

Progeny of ALDEFLUOR positive cells in vitro

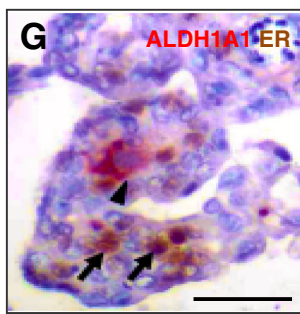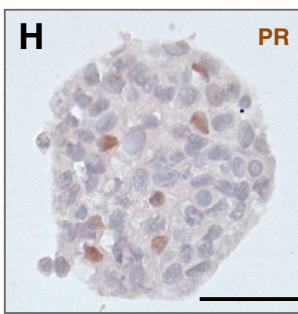

Supplement: MOESM10 [file 9704106]
